# Supplementary material for: The Bactericidal Activity of Protein Extracts from Loranthus europaeus Berries: A Natural Resource of Bioactive Compounds
Source: PubMed Central journal article supplement (PMC7168301; doi:10.3390/antibiotics9020047), 2020-01-28
Supplement: antibiotics-09-00047-s001.pdf [file antibiotics-09-00047-s001.pdf]

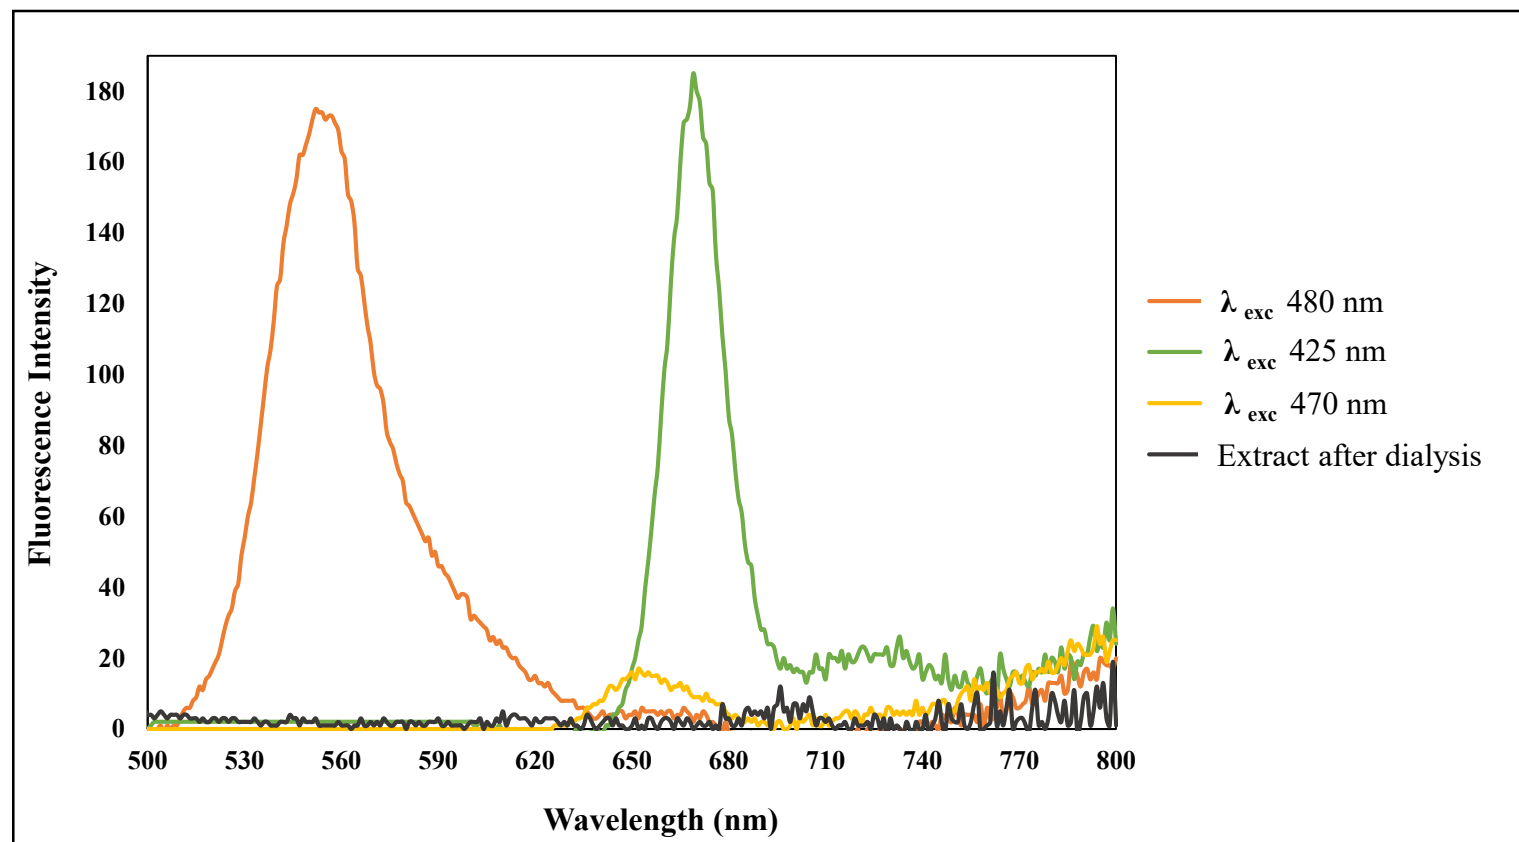

**Figure S1.** Fluorescence emission spectra of pigments extracted from protein fraction obtained by method 2, before and after dialysis of the sample, at different excitation wavelengths.
